# Supplementary material for: The global implications of a Russian gas pivot to Asia
Source: Springer Nature journal article supplement (doi:10.1038/s41467-024-55697-7), 2025-01-04
Supplement: 41467_2024_55697_MOESM2_ESM.pdf [file 41467_2024_55697_MOESM2_ESM.pdf]

## **Description of Additional Supplementary Files**

File Name: Supplementary Data 1

Description: This file contains the data values used in the manuscript graph-based figures
